# Supplementary material for: MiR-23a Regulates Skin Langerhans Cell Phagocytosis and Inflammation-Induced Langerhans Cell Repopulation
Source: MDPI journal article supplement (doi:10.3390/biology12070925), 2023-06-28
Supplement: s1 [file s1]

# Supplemental Figure S1

## A P0 LC gating strategy

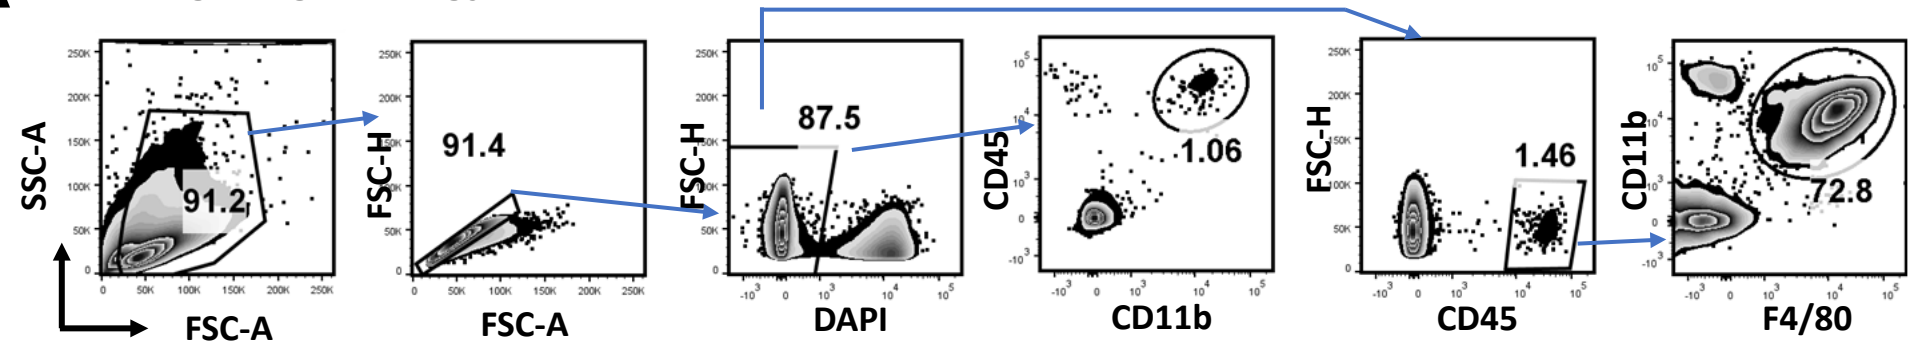

## B Adult LC gating strategy

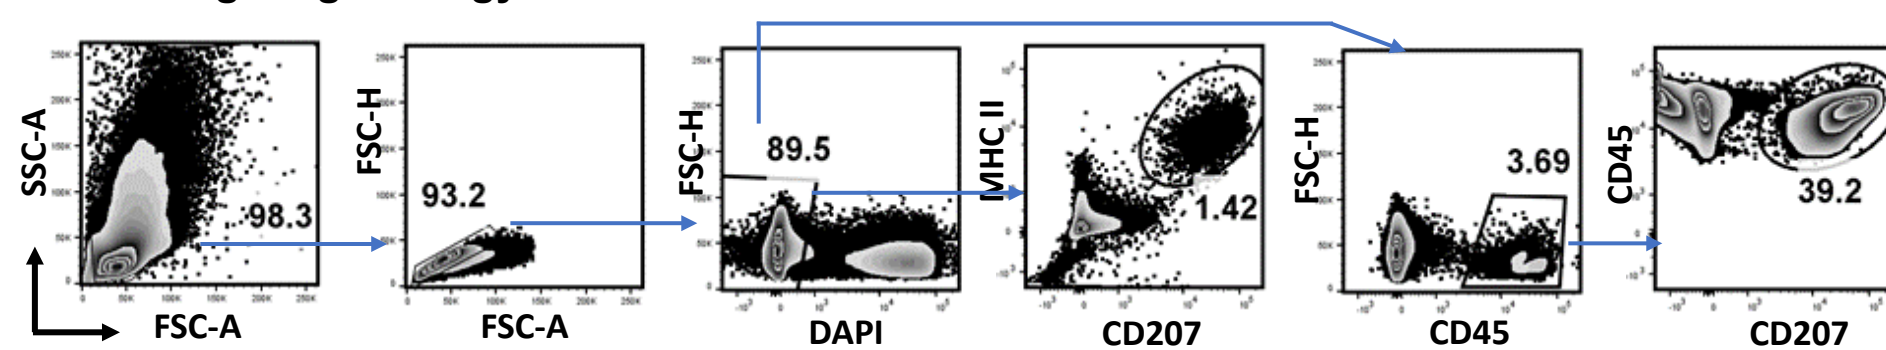

## C PBMC gating strategy

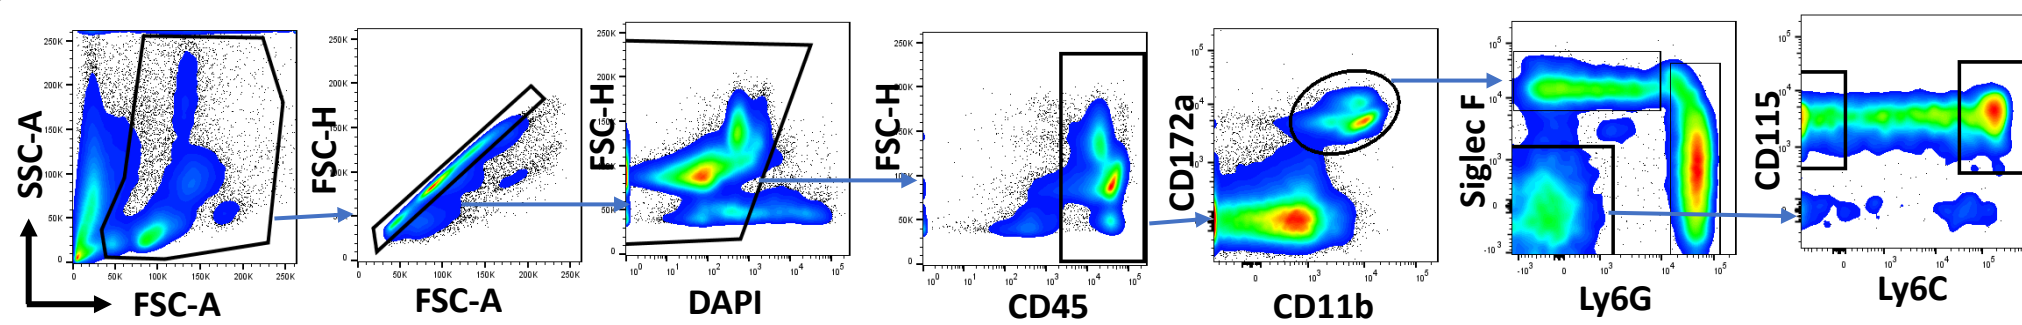

Supplemental Figure S1. Flow cytometry gating strategy for P0 epidermal LCs (A), adult epidermal LCs (B), and peripheral blood monocytes (C).

# Supplemental Figure S2

## A. GO terms enrichment (downregulated genes in miR-23 KO)

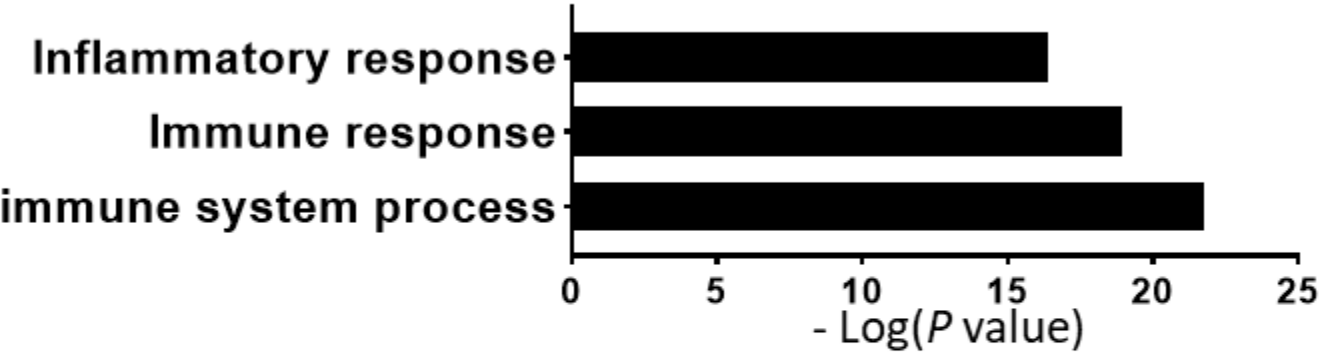

## B.

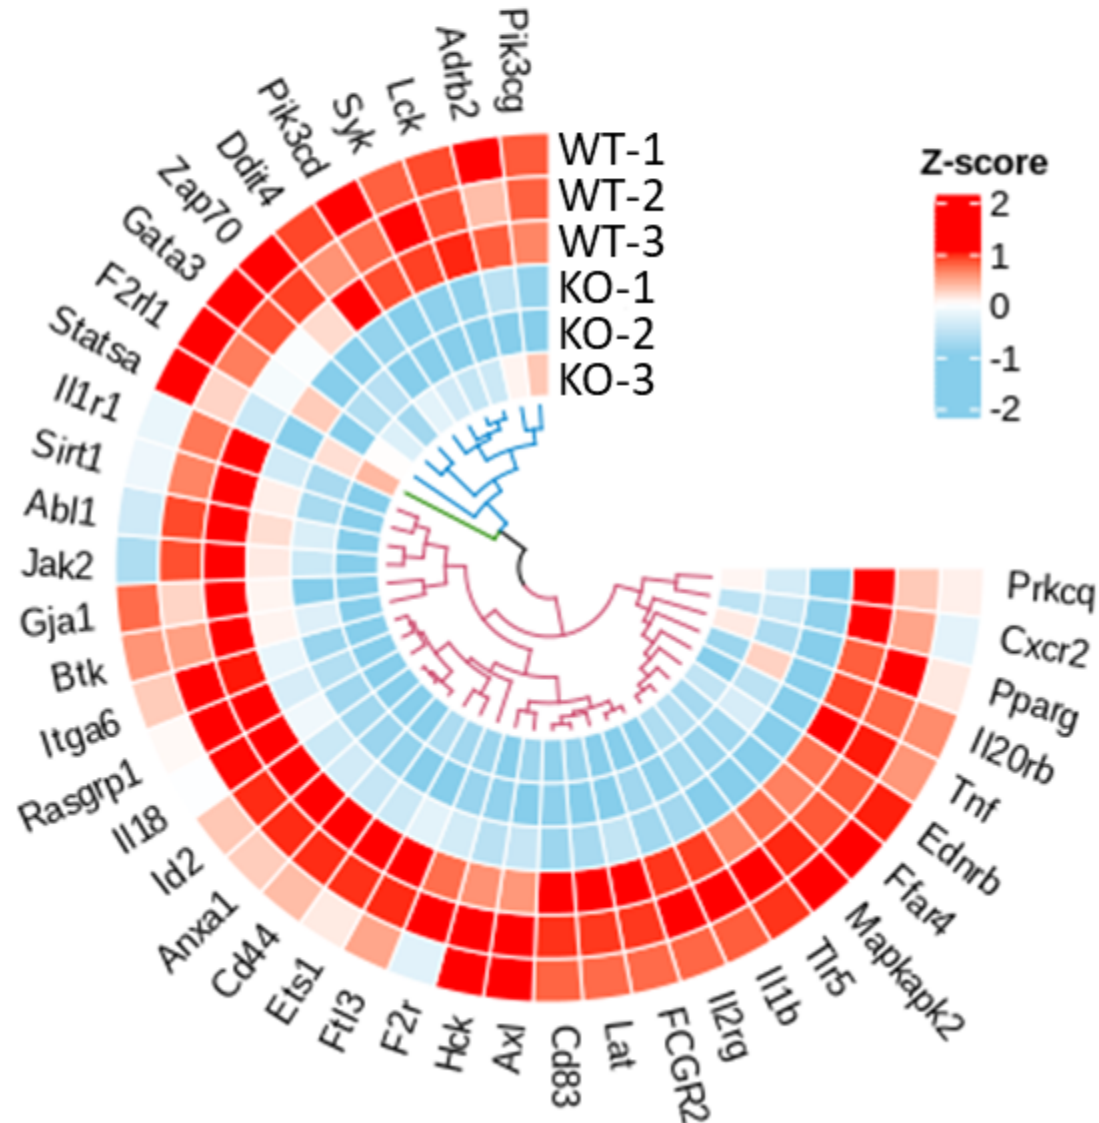

**Supplemental Figure S2. Down-regulated inflammatory response related genes in steady-state LCs with miR23a deletion. (A)** Gene ontology (GO) biological process enrichment analysis on the down-regulated genes in steady state miR23a KO LCs. **(B)** Heatmap showing the paired gene expression in the GO terms (A) in WT and miR23a KO LCs at steady state.

# Supplemental Figure S3

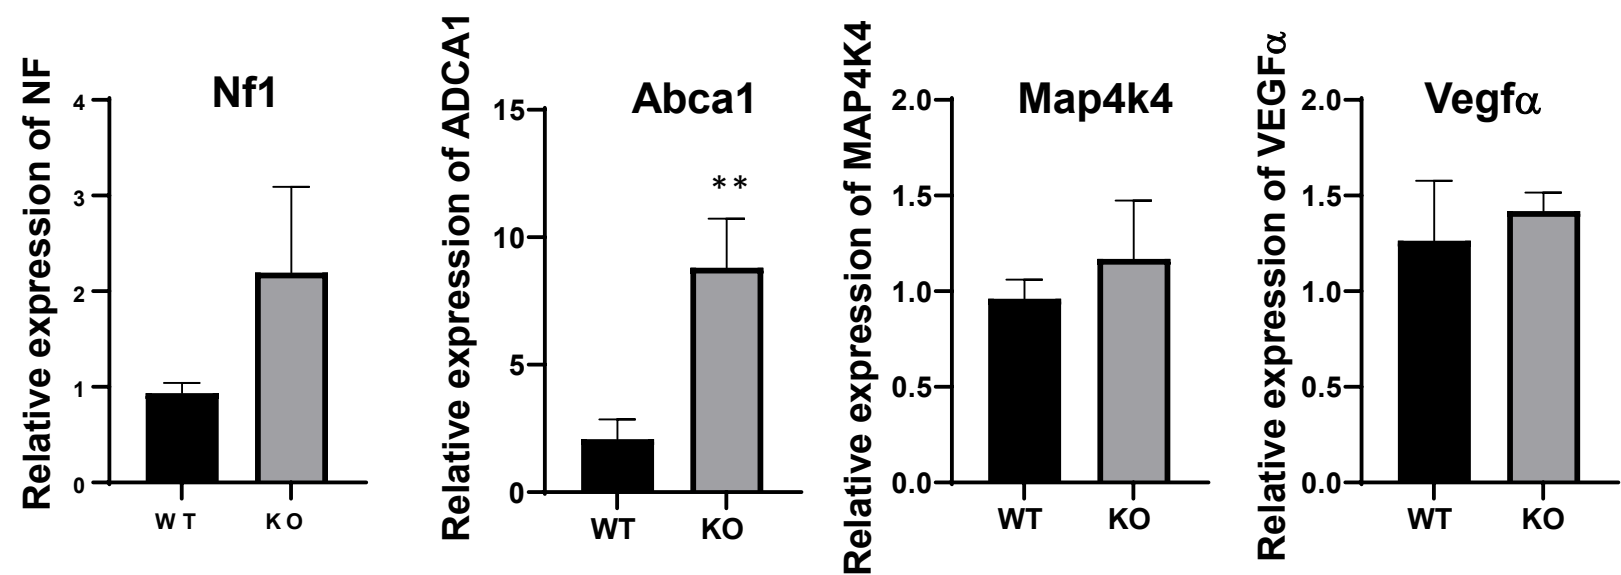

**Supplemental Figure S3. PT-PCR validation of upregulated miR23a target genes in miR23a KO Langerhans cells.** Four genes (Nf1, Abca1, Map4k4 and Vegfα) showed upregulation in miR23aKO LC detected by RNA-seq as Potential miR23a targets were selected to be validated using RT-PCR. Bars represent mean  $\pm$  SD. \*\*P < 0.01
